# Supplementary material for: Development of a core outcome set for traumatic brachial plexus injuries (COMBINE): study protocol
Source: PubMed Central journal article supplement (PMC6575635; doi:10.1136/bmjopen-2019-030146), 2019-06-14
Supplement: bmjopen-2019-030146.reviewer_comments.pdf [file bmjopen-2019-030146.reviewer_comments.pdf]

## PEER REVIEW HISTORY

BMJ Open publishes all reviews undertaken for accepted manuscripts. Reviewers are asked to complete a checklist review form (<http://bmjopen.bmj.com/site/about/resources/checklist.pdf>) and are provided with free text boxes to elaborate on their assessment. These free text comments are reproduced below.

## ARTICLE DETAILS

|                            |                                                                                                      |
|----------------------------|------------------------------------------------------------------------------------------------------|
| <b>TITLE (PROVISIONAL)</b> | Development of a core outcome set for traumatic brachial plexus injuries (COMBINE): a study protocol |
| <b>AUTHORS</b>             | Miller, Caroline; cross, jane; Power, Dominic; Kyte, Derek; Jerosch-Herold, Christina                |

This article was not externally reviewed at BMJ Open. Protocols that have been independently assessed prior to submission to BMJ Open are usually fast-tracked to publication on the grounds that further substantial changes will not be possible. This independent assessment will usually be external, independent review for both a substantial grant award from a non-commercial or government funder and ethics approval.
